# Supplementary material
Source: PubMed Central journal article supplement (PMC2758735)
Supplement: jc.2009-0686_1.pdf [file jc.2009-0686_1.pdf]

**Table 1. Oligonucleotide primer sequences used for the amplification and sequencing of the coding regions of the *SBP2* gene**

| <b>SBP2</b>   | <b>Forward</b>                | <b>Reverse</b>                  | <b>Annealing Temp (°C)</b> |
|---------------|-------------------------------|---------------------------------|----------------------------|
| <b>Exon1</b>  | 5'-CGCTTTGCTGTGACGCACTT-3'    | 5'-GCAGGCGGACGGACTGAG-3'        | 60                         |
| <b>Exon2</b>  | 5'-TTGGGTCTTTTTGTTTGTAT-3'    | 5'-AGAGCATTCTCTCATCATCTGC-3'    | 52                         |
| <b>Exon3</b>  | 5'-ACAGAAAAGCTTCTTGGTTTGC-3'  | 5'-AAAAGGTTTAAAGCAGCAAAT-3'     | 50.5                       |
| <b>Exon4</b>  | 5'-TGTGTCCTTTAGTTGGTTGCTT-3'  | 5'-AGGTCTCATTTCTTGGAGTAGTCA-3'  | 50.5                       |
| <b>Exon5</b>  | 5'-CGGTAAGAGTTACGGTGTTTTGC-3' | 5'-GGCTTCCCCAATACATCCT-3'       | 54                         |
| <b>Exon6</b>  | 5'-CAAAGTGTCTGGATTTTGATATG-3' | 5'-TCAACTGCACTGGAGTTAAAAA-3'    | 49.5                       |
| <b>Exon7</b>  | 5'-TGCATGTTTGAGTAACTAAGGA-3'  | 5'-AACCATCATCACCATCCATC-3'      | 51                         |
| <b>Exon8</b>  | 5'-CAGGGGATGAGGAACCTAAT-3'    | 5'-GCCCTGGAGATTTTCACTTA-3'      | 50                         |
| <b>Exon9</b>  | 5'-AAGGGACCTTACTGAAGAATGA-3'  | 5'-GCATTTAGTTGAGCCAGAAGAGTT-3'  | 51.5                       |
| <b>Exon10</b> | 5'-TTGTAAAAAGAAAAGCACAGTT-3'  | 5'-TCCACAGGTCCTTATCTATGCT-3'    | 50                         |
| <b>Exon11</b> | 5'-GGACAAGCTGGGGGTGACT-3'     | 5'-AATCTAAGAGCTGGGAGAATAACTA-3' | 56                         |
| <b>Exon12</b> | 5'-GGCACTAAGAGGCACATTGC-3'    | 5'-AGTCCTGGAGAGTTTGCTCA-3'      | 51.5                       |
| <b>Exon13</b> | 5'-GTCTGTGAATGTGGTGGTTGT-3'   | 5'-GCTCTCCCTGAATGCGTGTA-3'      | 56                         |
| <b>Exon14</b> | 5'-TTGGGAATGGGGGAAGATGC-3'    | 5'-AAAACCACAAAGAAAACGAGTT-3'    | 55                         |
| <b>Exon15</b> | 5'-ATAGATGGGTGTGTTGCTAAGAA-3' | 5'-GGTGGCTCCTCCTCAATGAC-3'      | 55                         |
| <b>Exon16</b> | 5'-GCATGAGGTCCACATTACCC-3'    | 5'-AGGCAATGGGCTGGACTTAC-3'      | 57.5                       |
| <b>Exon17</b> | 5'-CTGCTGGTTTTCTTACAGGAG-3'   | 5'-CACCAGGCTTTTAGAGAAGATT-3'    | 52.5                       |

Initial denaturation: 94°C 3'

38 cycles: Denaturation: 94°C 1'

Annealing: see temp 1'

Extension: 72°C 1'

Terminal extension: 72°C 10'
