# Supplementary material
Source: PubMed Central journal article supplement (PMC2758735)
Supplement: jc.2009-0686_2.pdf [file jc.2009-0686_2.pdf]

**Table 2. Oligonucleotide primer sequences and their location for the quantification of SBP2 mRNA isoforms, generated by alternative splicing at exon 3 and determination of the proportion of WT and mutant isoforms using TaqI enzyme digestion**

| Primer Set                                                          | Forward Primer            |                               | Reverse Primer   |                                 | Amplicon                        |
|---------------------------------------------------------------------|---------------------------|-------------------------------|------------------|---------------------------------|---------------------------------|
|                                                                     | Location                  | Sequence                      | Location         | Sequence                        |                                 |
| <b>A: Quantification by real-time PCR</b>                           |                           |                               |                  |                                 |                                 |
| 1                                                                   | Ex2 joint to Ex3          | 5'-CCACCAGTGACAGAGCAGA-3'     | Ex3 joint to Ex4 | 5'-TTTCTCATCATAGGTTTTCTTCTTA-3' | intact Ex3                      |
| 2                                                                   | Ex2 joint to 122bp of Ex3 | 5'-GAACCACCAGTGACAGAAATGT-3'  | Ex3 joint to Ex4 | 5'-TTTCTCATCATAGGTTTTCTTCTTA-3' | partial deletion of 5' Ex3      |
| 3                                                                   | Ex2 joint to Ex4          | 5'-GAACCACCAGTGACAGAAAGA-3'   | Ex4 joint to Ex5 | 5'-ATGGTAACCATCTGATTTCAAAC-3'   | complete deletion of Ex3        |
| 4                                                                   | Ex4 joint to Ex5          | 5'-AATCAGATGGTTACCATAAGCG-3'  | Ex5              | 5'-CTTGGGTTGCTTCTGTATCTC-3'     | control, Ex4 to Ex5             |
| <b>B: Proportion of Wt and Mutant isoforms using TaqI digestion</b> |                           |                               |                  |                                 |                                 |
| 1                                                                   | Ex2 joint to Ex3          | 5'-CCACCAGTGACAGAGCAGA-3'     | Ex3 joint to Ex4 | 5'-TTTCTCATCATAGGTTTTCTTCTTA-3' | intact Ex3                      |
| 2                                                                   | Ex2 joint to 122bp of Ex3 | 5'-GAACCACCAGTGACAGAAATGT-3'  | Ex4 joint to Ex5 | 5'-ATGGTAACCATCTGATTTCAAAC-3'   | partial deletion of 5' Ex3      |
| 3                                                                   | at 155bp of Ex3           | 5'-TATAACCAACCCAGTTGTTACCG-3' | Ex4 joint to Ex5 | 5'-ATGGTAACCATCTGATTTCAAAC-3'   | all Ex3 mutant isoforms include |
